# Supplementary material for: Single-Cell Dissection of the Multiomic Landscape of High-Grade Serous Ovarian Cancer
Source: PubMed Central journal article supplement — Cancer Res. 2022 Aug 16;82(21):3903–16. doi: 10.1158/0008-5472.CAN-21-3819 (PMC9627134; doi:10.1158/0008-5472.can-21-3819), 2022-08-16

# Supplemental Figure S1

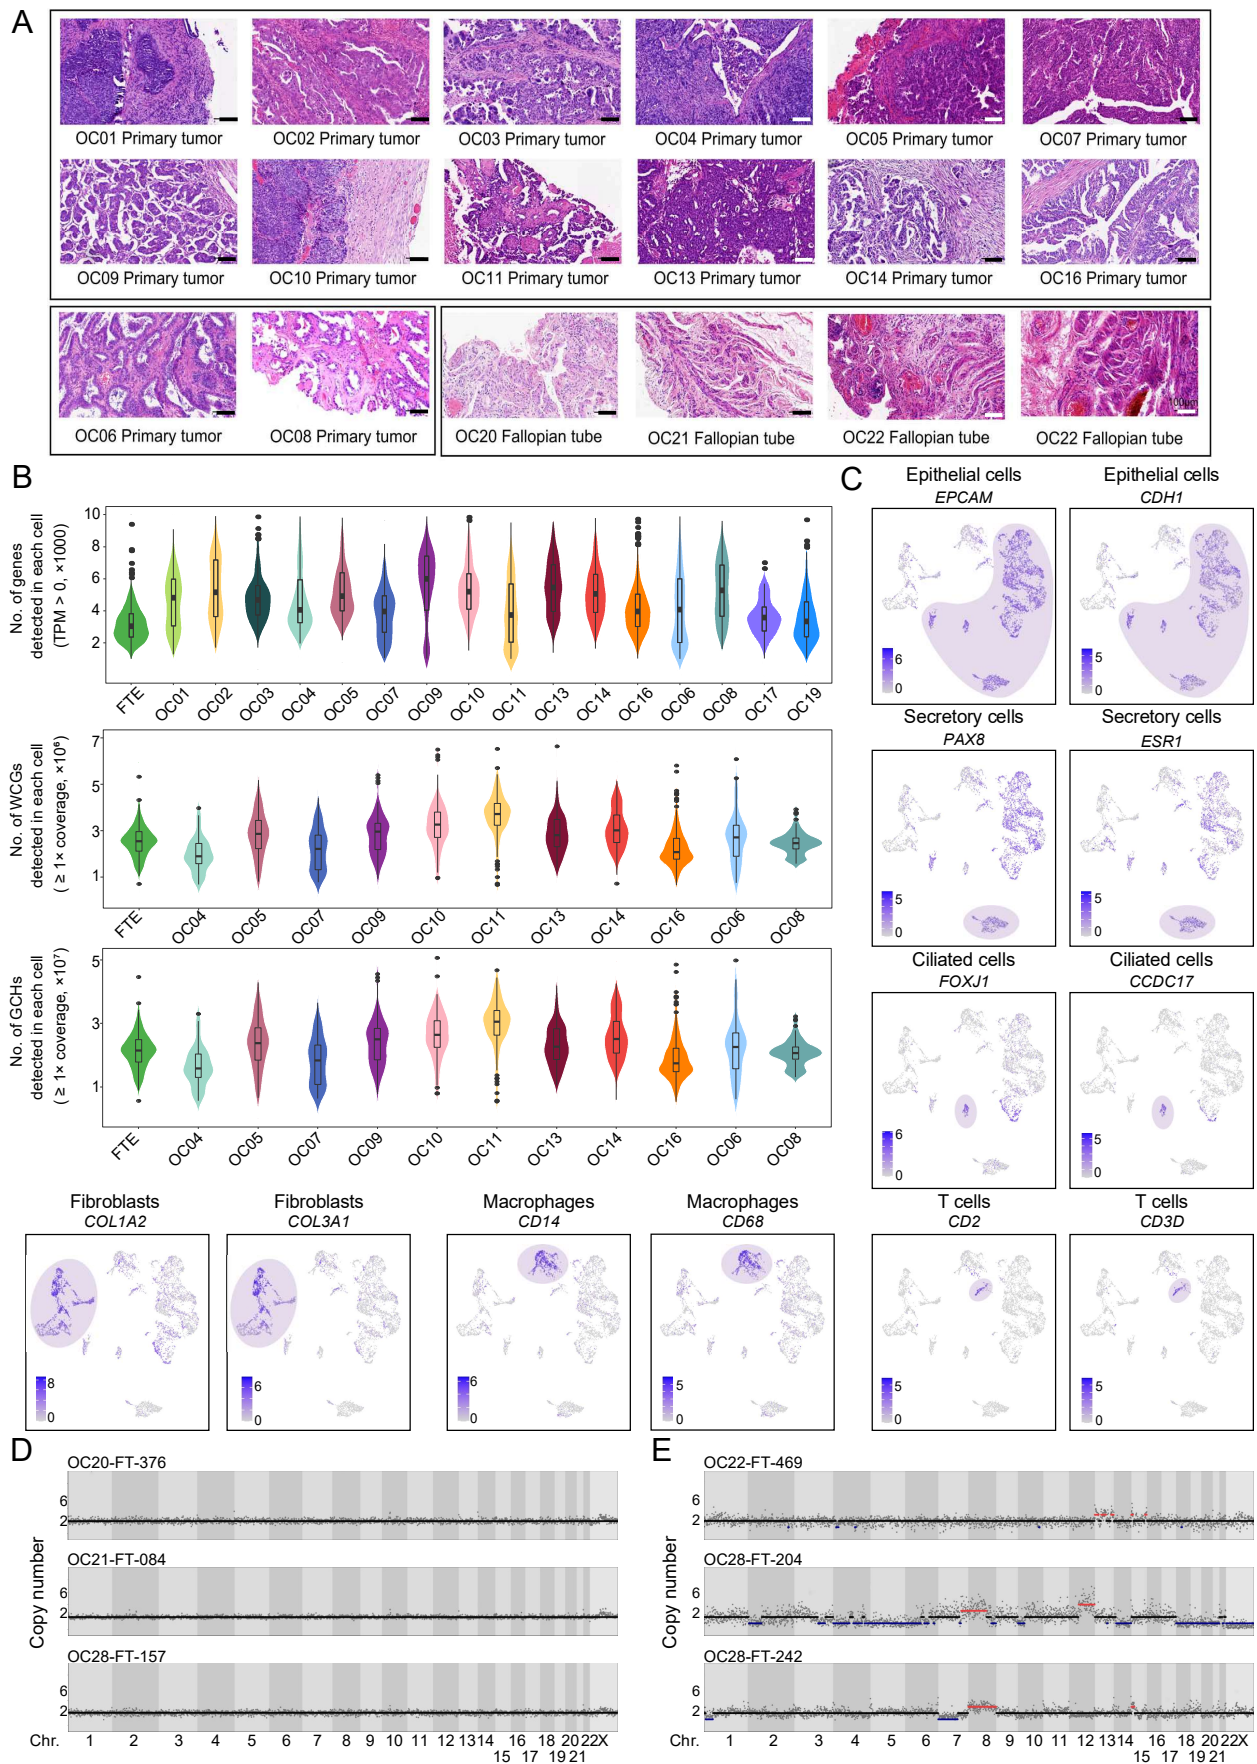

Supplemental Figure S2

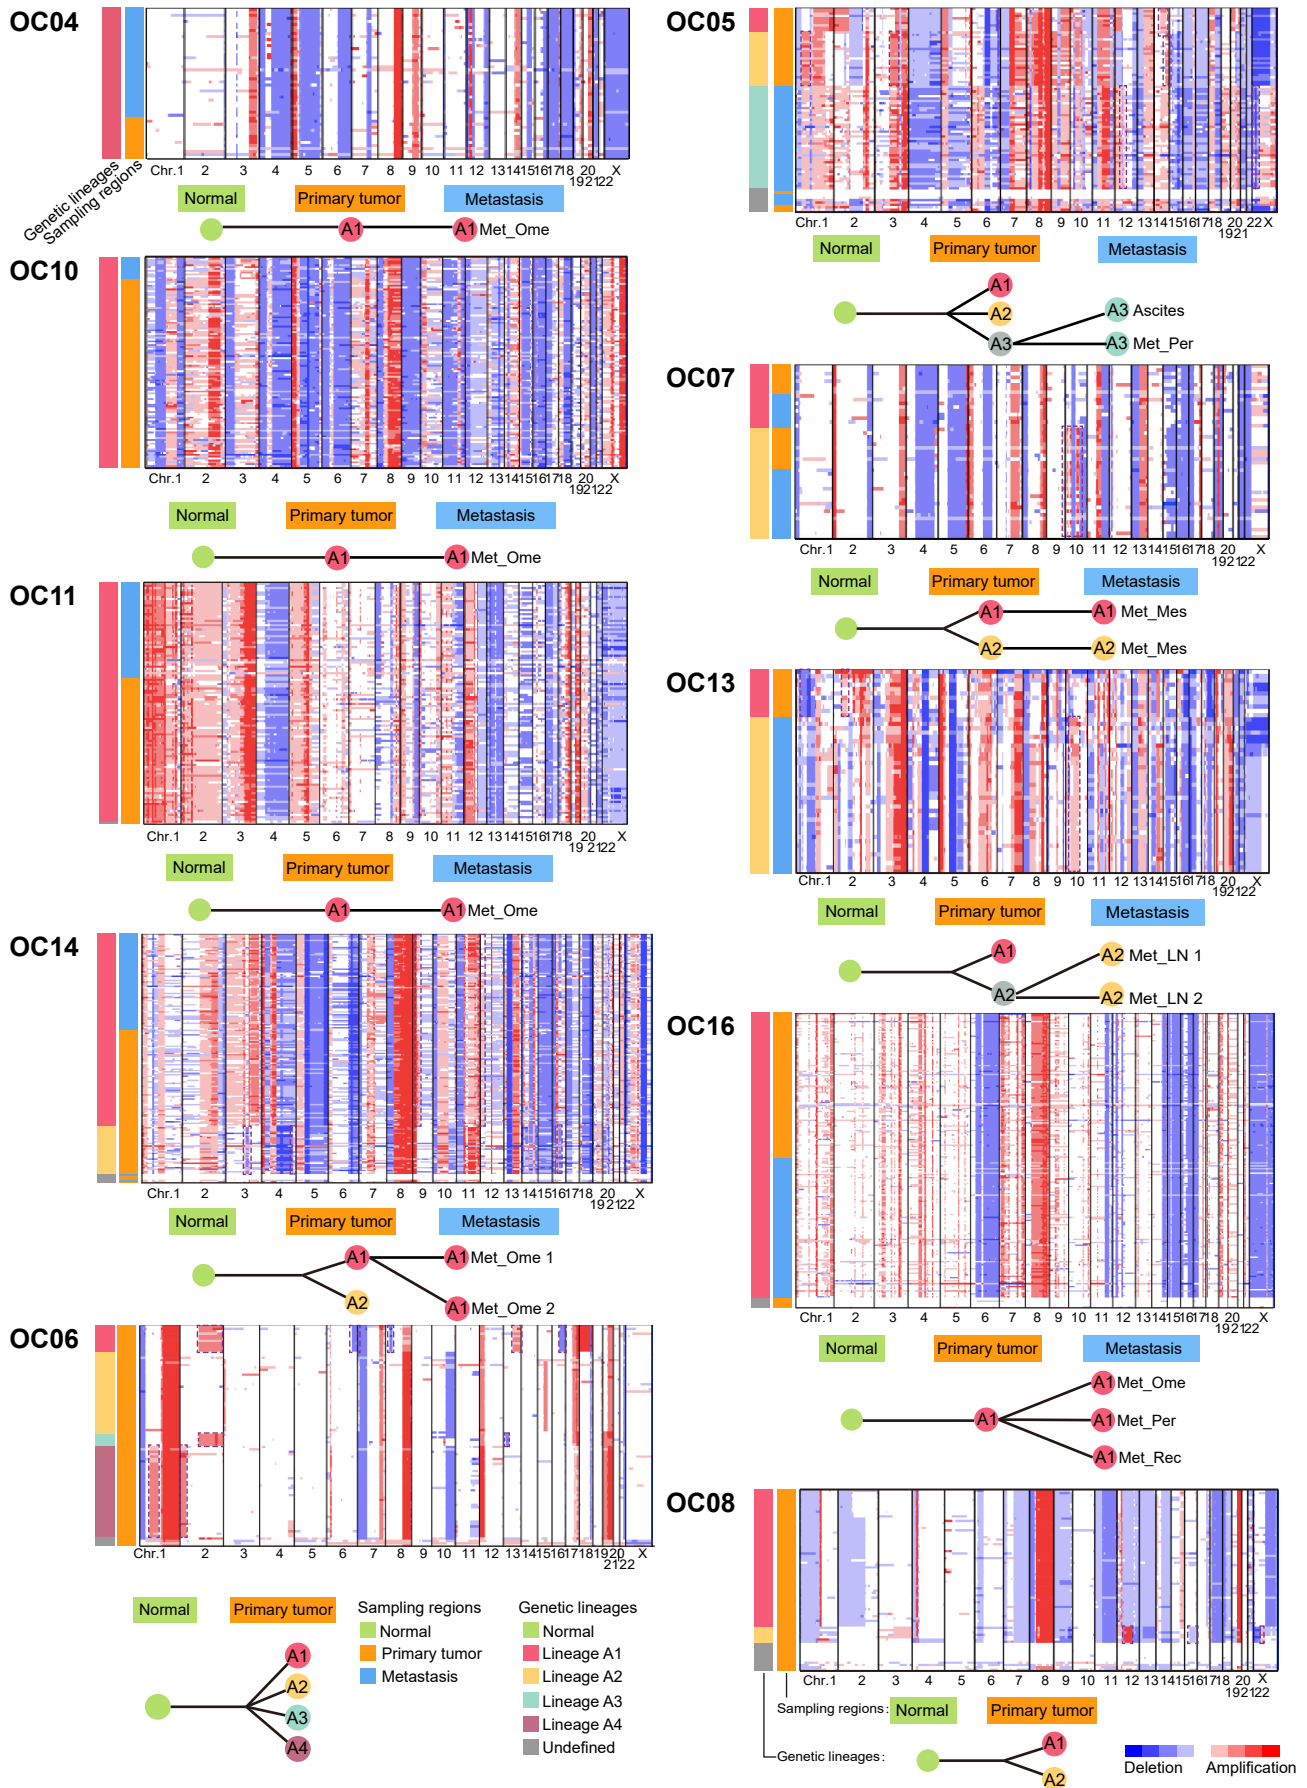

Supplemental Figure S3

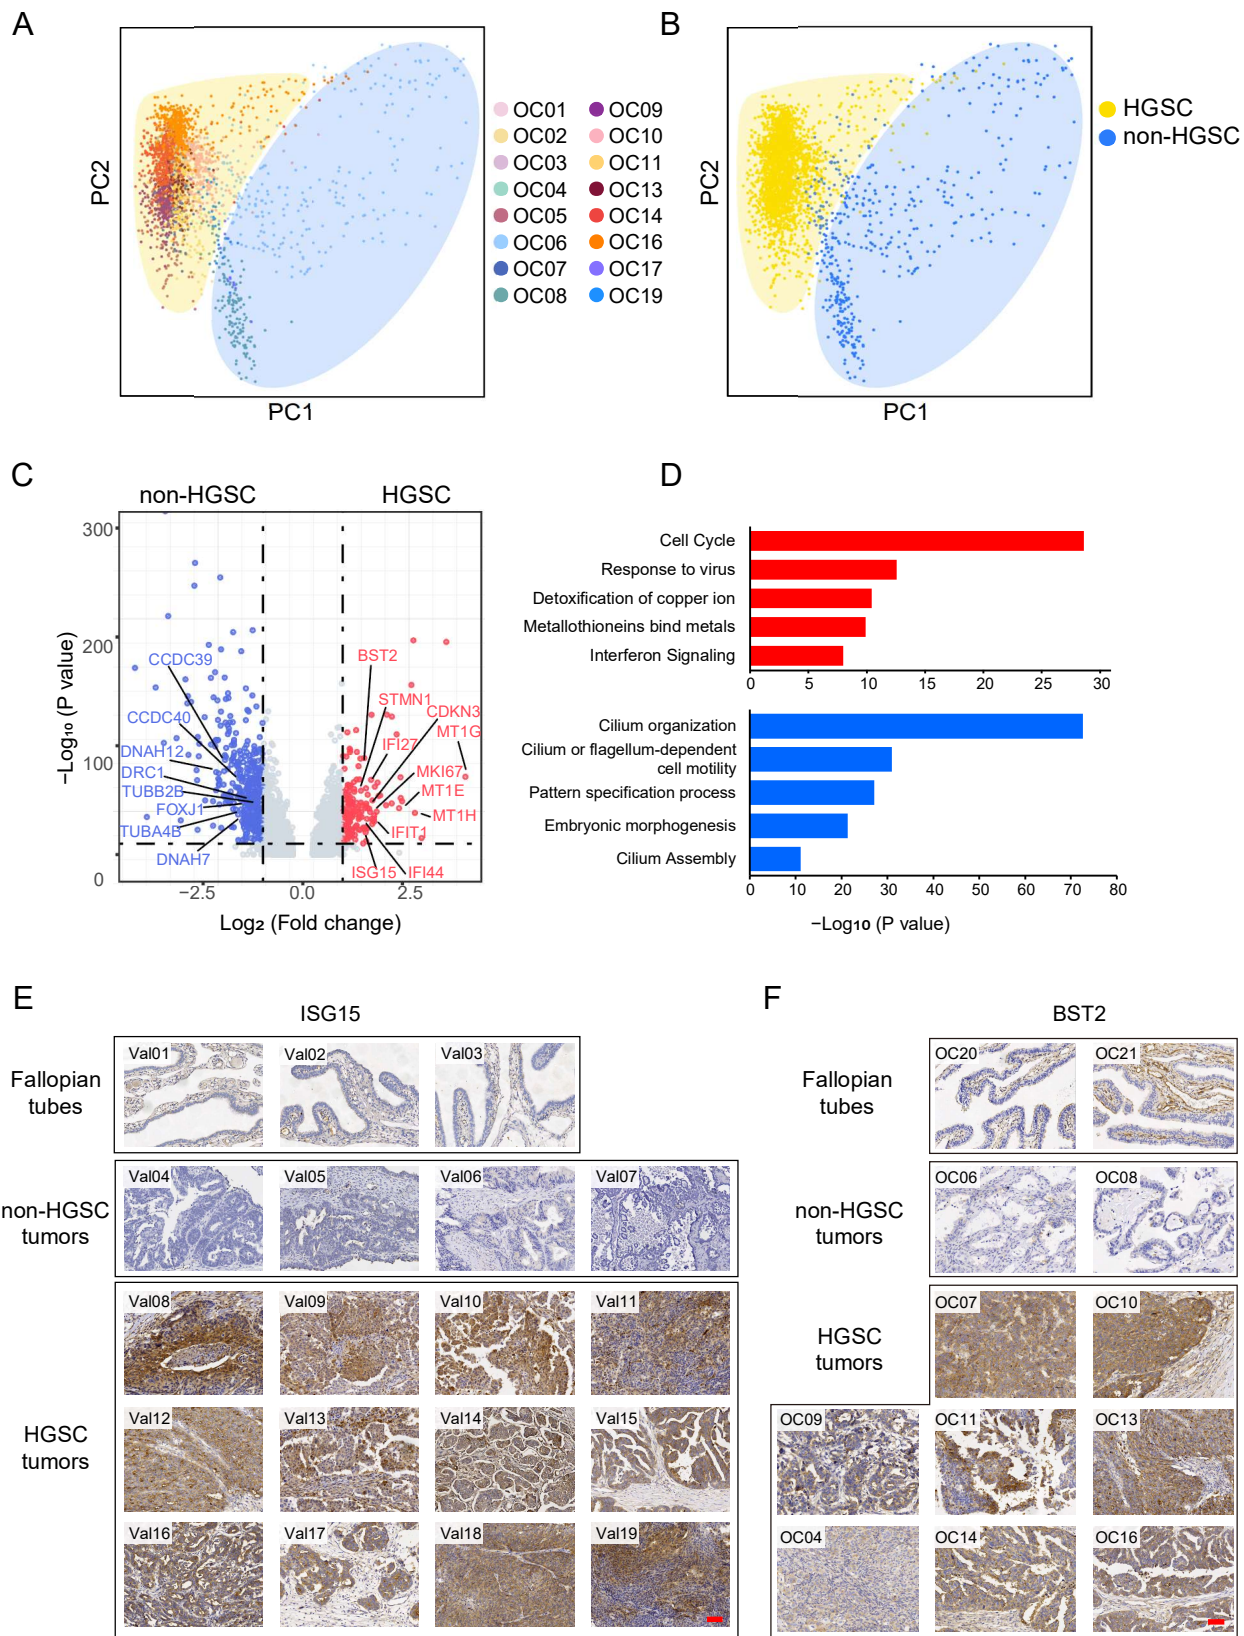

Supplemental Figure S4

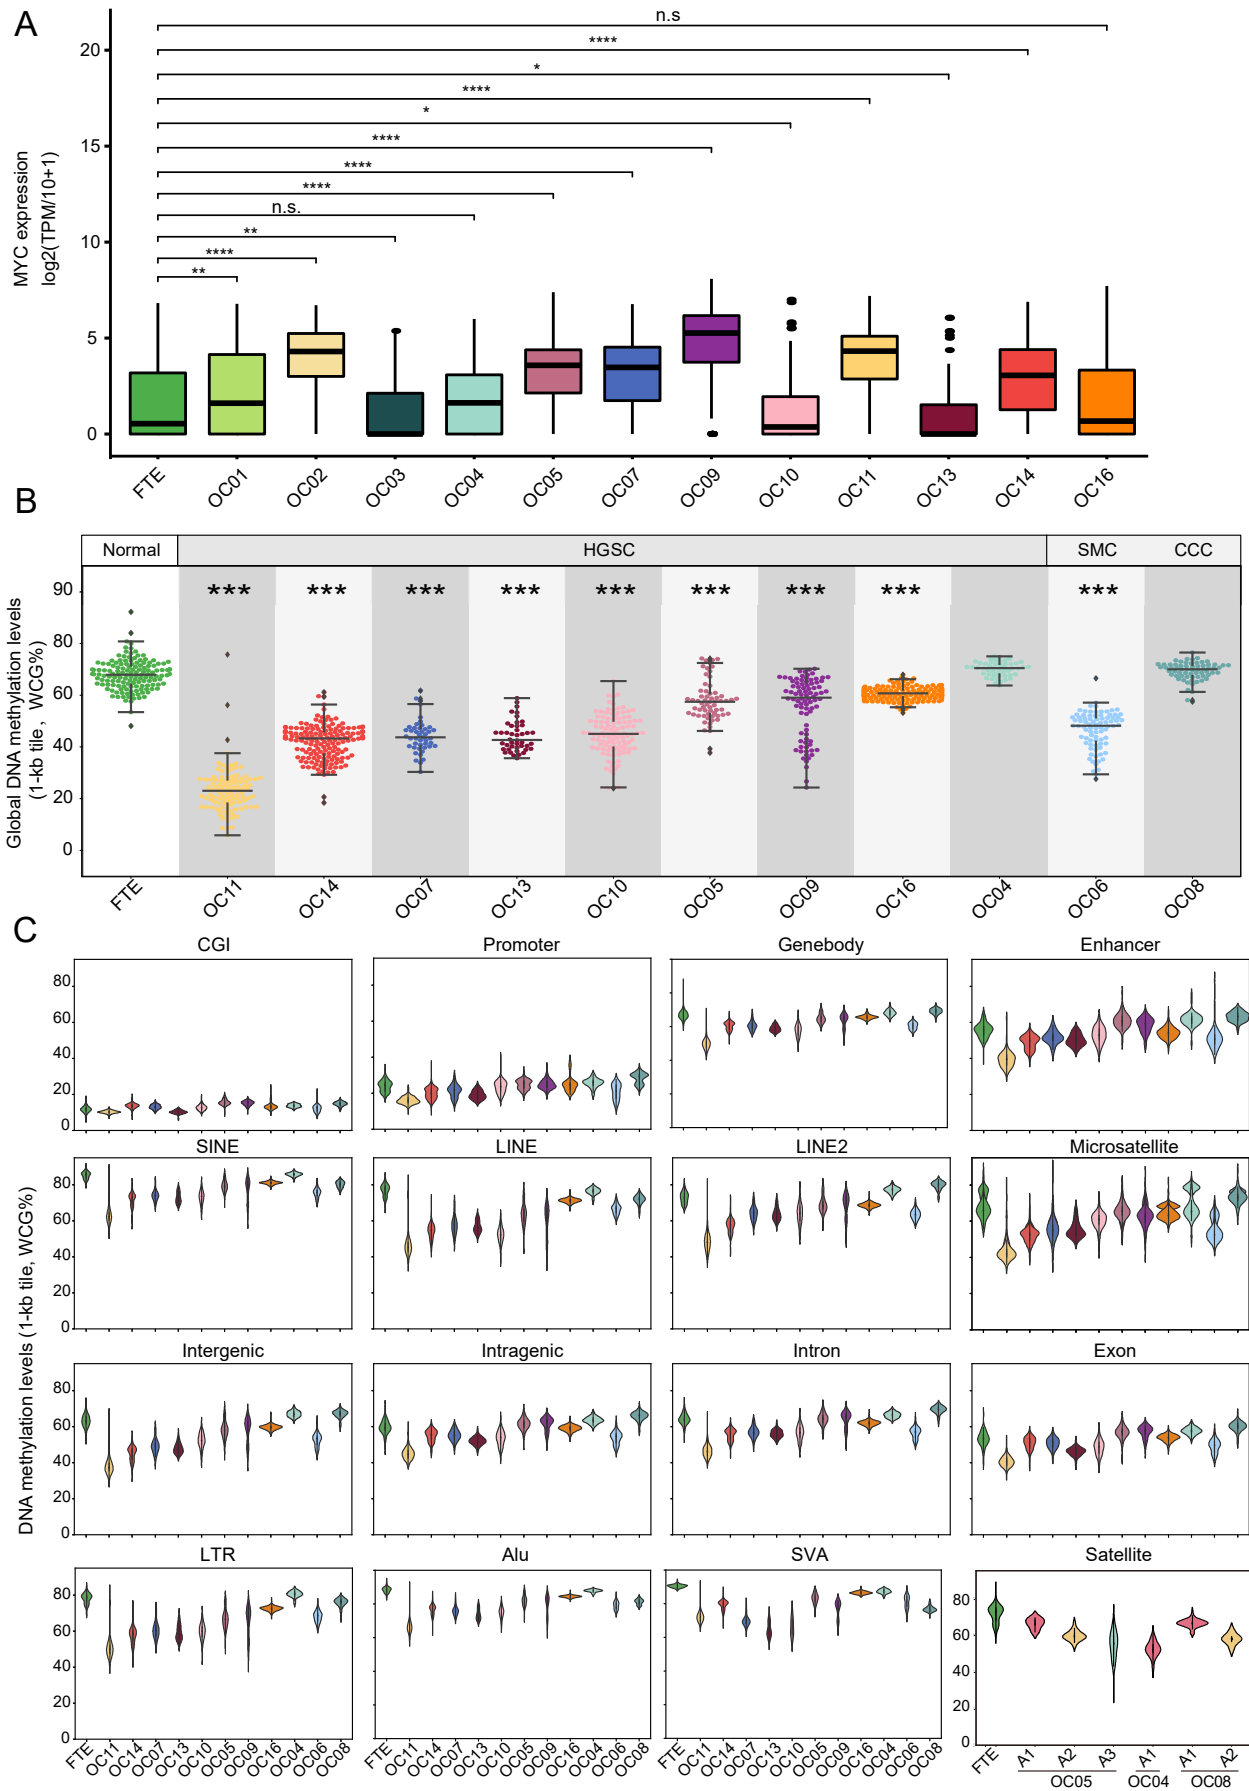

Supplemental Figure S5

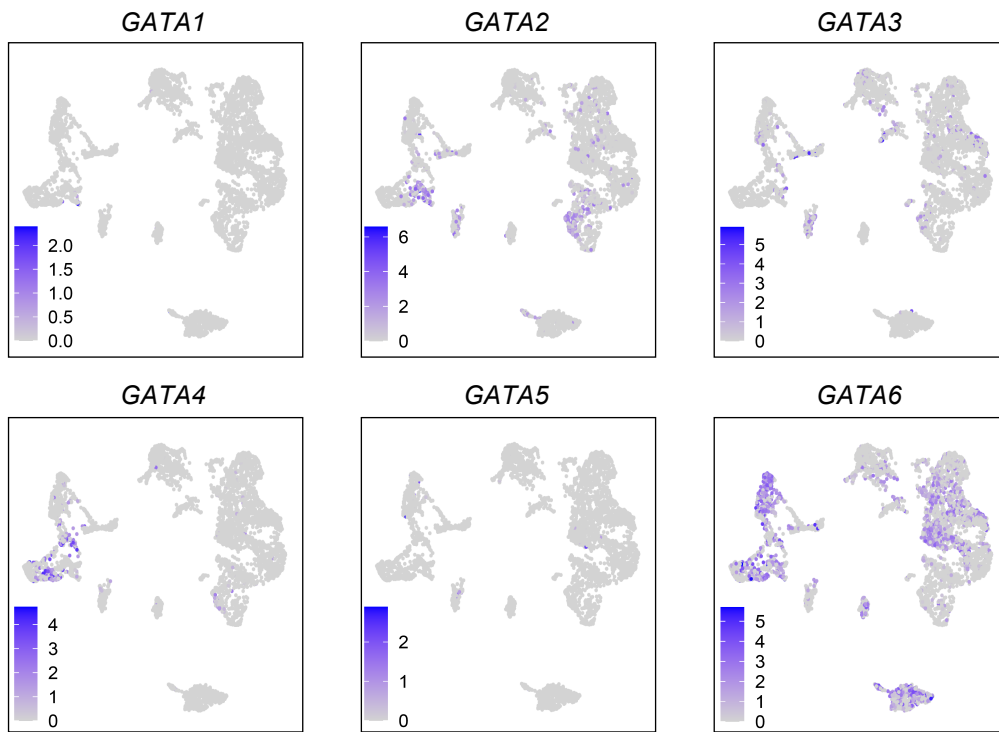

Supplemental Figure S6

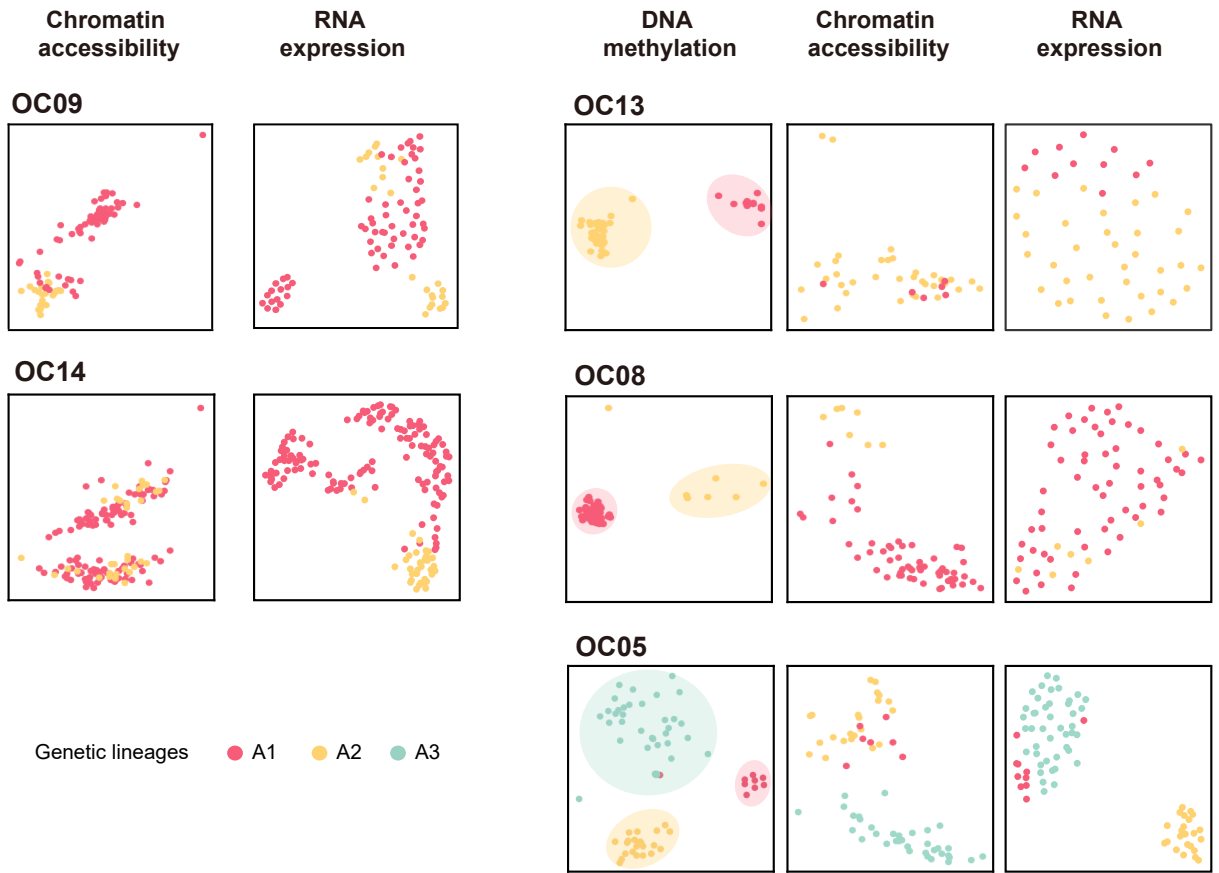

Supplemental Figure S7

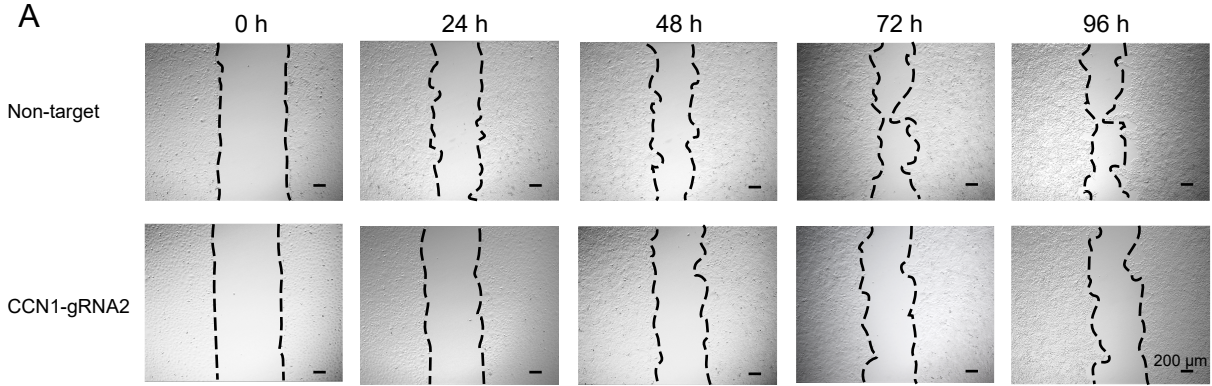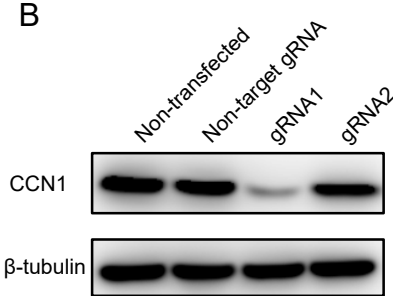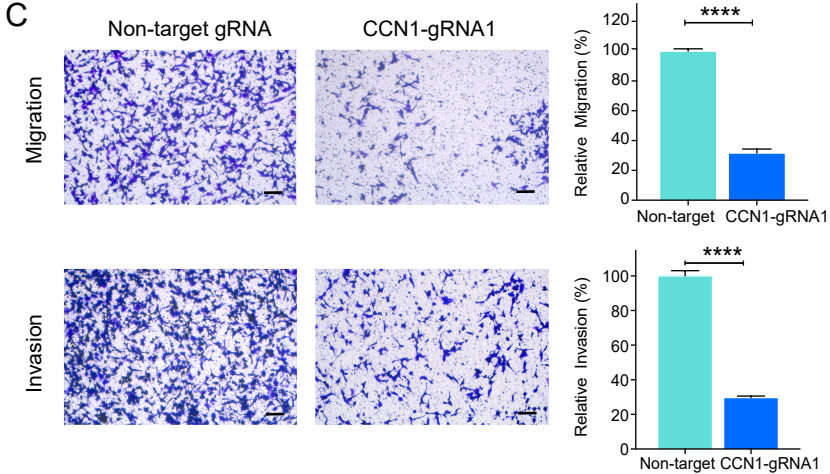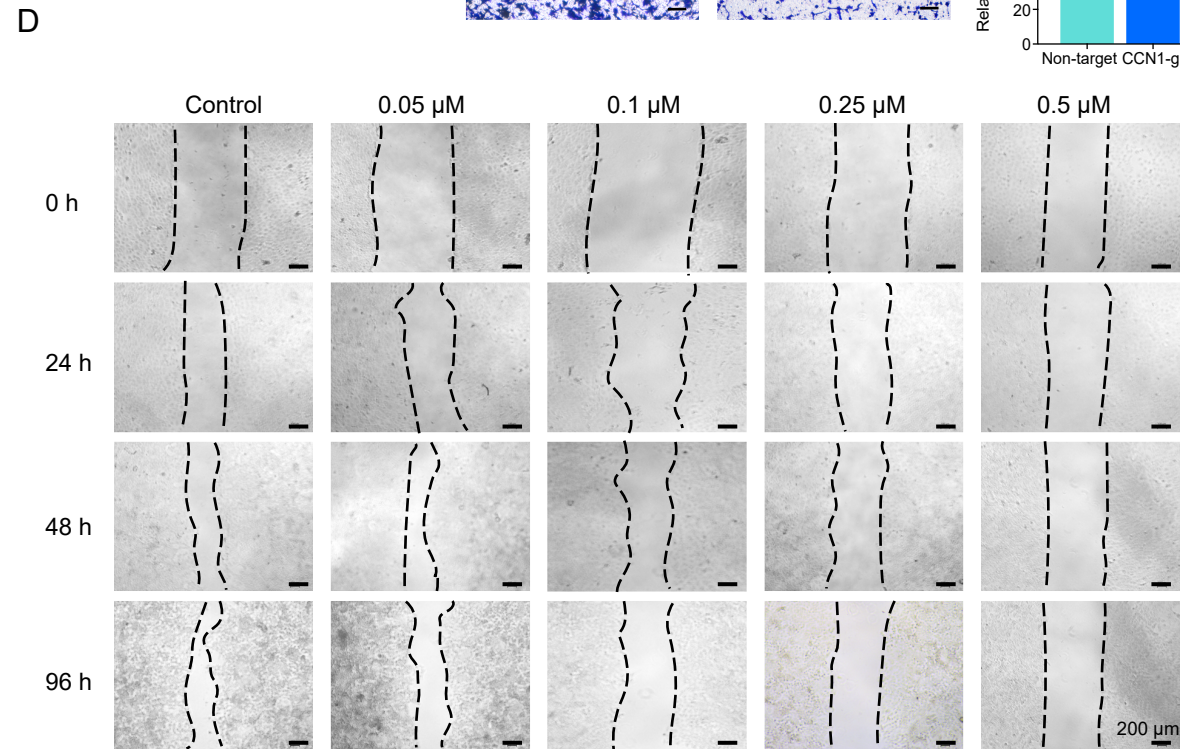

E

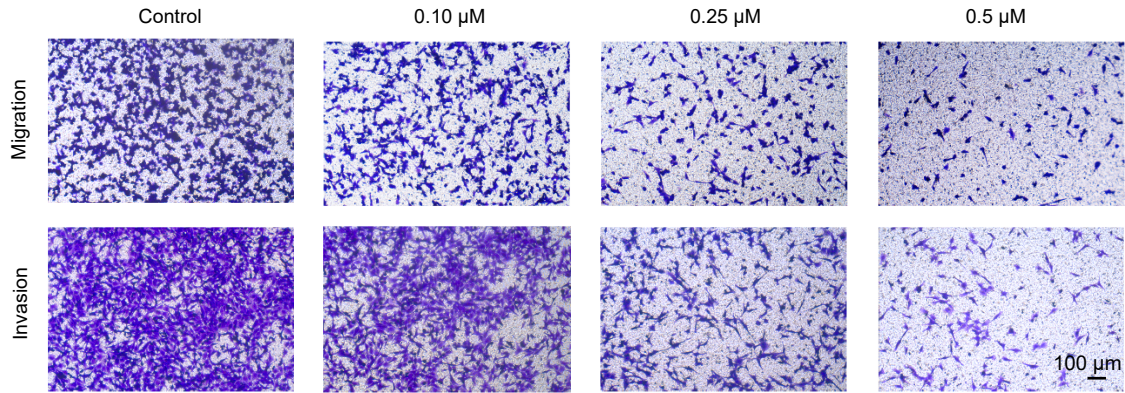

F

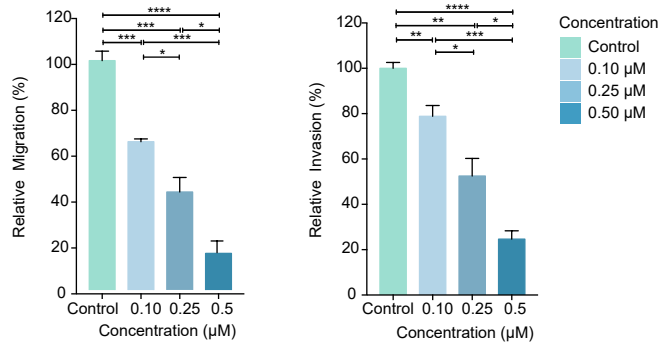

G

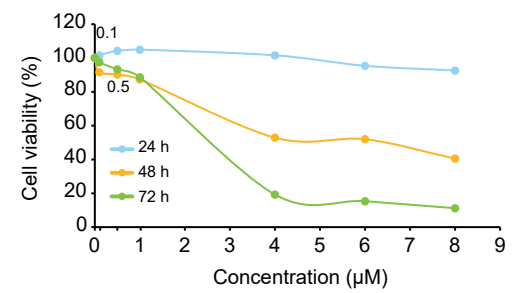



Supplemental Figure S8

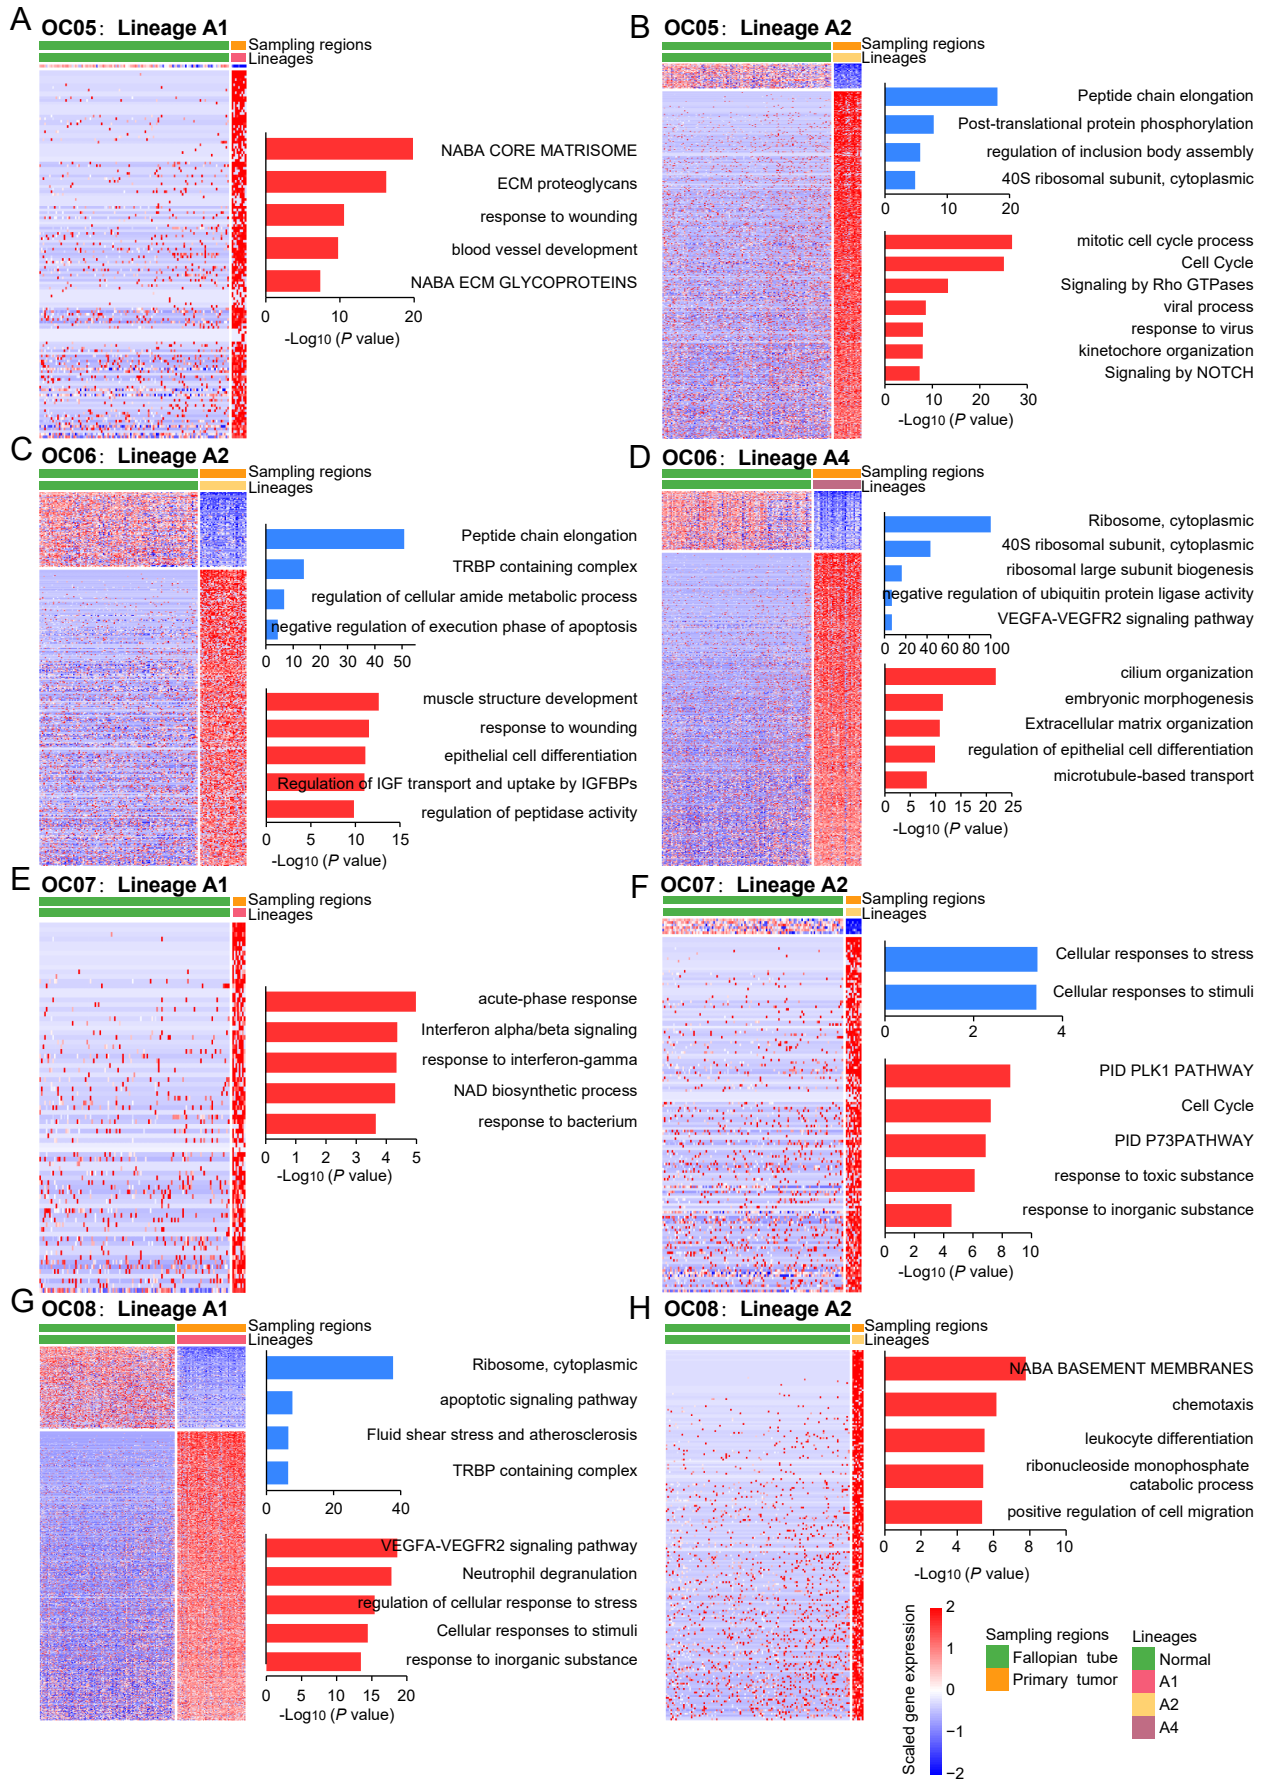

Supplement: can-21-3819_supplementary_figures_suppsf1-sf8.pdf [file can-21-3819_supplementary_figures_suppsf1-sf8.pdf]
